# Supplementary material
Source: PubMed Central journal article supplement (PMC5710249)
Supplement: jamapsychiatry-74-694-s001.pdf [file jamapsychiatry-74-694-s001.pdf]

## Supplementary Online Content

Chung DT, Ryan CJ, Hadzi-Pavlovic D, Singh SP, Stanton C, Large MM. Suicide rates after discharge from psychiatric facilities: a systematic review and meta-analysis. *JAMA Psychiatry*. Published online May 31, 2017. doi:10.1001/jamapsychiatry.2017.1044

**eTable 1.** Included Studies

**eTable 2.** Excluded Studies

**eTable 3.** Sample-Level Data, Strength of Reporting, and Study Characteristics

This supplementary material has been provided by the authors to give readers additional information about their work.

**eTable 1.** Included Studies

| Study                         | Location                                                | Period        | Suicide Ascertainment | Mean duration of Follow-up (months) | Type of Patient               | Suicides | Suicides per 100,000 patient years |
|-------------------------------|---------------------------------------------------------|---------------|-----------------------|-------------------------------------|-------------------------------|----------|------------------------------------|
| Ajetunmobi et al. (2013) (1)  | All psychiatric facilities in Scotland, UK              | 1986-2010     | Coronial records      | 150                                 | Unselected adults             | 2822     | 202                                |
| Angst et al. (2002) (2)       | Psychiatric Hospital, University of Zurich, Switzerland | 1956-1997     | Coronial records      | 432                                 | Mood disorders                | 44       | 301                                |
| Avery & Winokur (1976) (3)    | All psychiatric facilities in Iowa, USA                 | 1959-1972     | Coronial records      | 36                                  | Depression                    | 8        | 514                                |
| Barbato et al. (1992) (4)     | 21 general psychiatric units, Italy                     | Not specified | Study follow-up       | 6                                   | Unselected adults             | 5        | 929                                |
| Bergen et al. (2009) (5)      | Three inpatient wards, Sydney, Australia                | 1995          | Study follow-up       | 6                                   | Schizophrenia                 | 1        | 2020                               |
| Berglund & Nilsson (1987) (6) | Department of Psychiatry, University                    | 1956-1983     | Coronial records      | 246                                 | Severe depression/melancholia | 103      | 417                                |

|                                      |                                                                                                                           |               |                                                      |     |                            |     |      |
|--------------------------------------|---------------------------------------------------------------------------------------------------------------------------|---------------|------------------------------------------------------|-----|----------------------------|-----|------|
|                                      | Hospital,<br>Lund,<br>Sweden                                                                                              |               |                                                      |     |                            |     |      |
| Best et al.<br>(2004) (7)            | Unspecified<br>metropolitan area,<br>North<br>Eastern<br>USA                                                              | 1978-<br>2002 | Study<br>follow-<br>up and<br>newspap<br>er reports  | 240 | Adolescents                | 1   | 71   |
| Bjorkensta<br>m et al.<br>(2014) (8) | All<br>psychiatric<br>facilities in<br>Sweden                                                                             | 1988-<br>2008 | Coronial<br>records                                  | 31  | First episode<br>psychosis | 121 | 1678 |
| Black et al.<br>(1985) (9)           | University<br>of Iowa<br>Psychiatric<br>Hospital,<br>Iowa City,<br>USA                                                    | 1972-<br>1981 | Coronial<br>records                                  | 51  | Unselected<br>Adults       | 68  | 297  |
| Blumenthal<br>et al.<br>(1989) (10)  | Günzburg<br>Regional<br>Hospital,<br>Germany                                                                              | 1979-<br>1984 | Hospital<br>records<br>and<br>study<br>follow-<br>up | 60  | First admission<br>adults  | 12  | 930  |
| Brent et al.<br>(1993) (11)          | Adolescent<br>and Young<br>Adult<br>inpatient<br>unit,<br>Western<br>Psychiatric<br>Institute<br>and Clinic,<br>Pennsylva | 1986-<br>1989 | Not<br>specified                                     | 6   | Adolescents                | 0   | 0    |

|                              |                                                     |               |                                    |     |                                    |     |      |
|------------------------------|-----------------------------------------------------|---------------|------------------------------------|-----|------------------------------------|-----|------|
|                              | nia, USA                                            |               |                                    |     |                                    |     |      |
| Brody et al. (1997) (12)     | Prince Henry Hospital, Sydney, Australia            | 1966-1995     | Coronial records                   | 300 | Depression                         | 13  | 245  |
| Burvill & Hall (1994) (13)   | Unspecified psychiatric hospitals, Perth, Australia | Not specified | Coronial records                   | 60  | Geriatric patients with depression | 4   | 778  |
| Castelein et al. (2015) (14) | Psychiatric hospitals in Groningen, the Netherlands | 2000-2011     | Regional psychiatric case register | 67  | Recent onset psychosis             | 10  | 421  |
| Charrel et al. 2015 (15)     | Unspecified psychiatric hospital, France            | 2004-2007     | Coronial records                   | 61  | Unselected adults                  | 123 | 529  |
| Chen et al. (1996) (16)      | All psychiatric facilities in Taiwan                | 1987-1994     | Coronial records                   | 72  | Unselected adults                  | 98  | 122  |
| Choi et al. (2012) (17)      | Unspecified hospital, South Korea                   | 2003-2006     | Coronial records                   | 21  | Unselected adults                  | 33  | 825  |
| Clark et al.                 | Six centres,                                        | Not specified | Coronial                           | 24  | Unselected                         | 14  | 1180 |

|                             |                                                                     |           |                      |     |                                 |    |     |
|-----------------------------|---------------------------------------------------------------------|-----------|----------------------|-----|---------------------------------|----|-----|
| (1987) (18)                 | USA                                                                 | fied      | records              |     | adults                          |    |     |
| Coid et al. (2007) (19)     | 7 Regional Health Authorities, England and Wales, UK                | 1989-1998 | NHS Central Register | 74  | Medium secure forensic patients | 30 | 456 |
| Craig et al. (2006) (20)    | 12 hospitals in Suffolk County, New York, USA                       | 1989-2004 | Coronial             | 120 | First admission psychosis       | 7  | 123 |
| Crisanti & Love (1999) (21) | Department of Psychiatry, Calgary General Hospital, Alberta, Canada | 1987-1996 | Coronial records     | 60  | Unselected adults               | 47 | 454 |
| Curtis (1996) (22)          | Harlem Hospital Center, New York City, USA                          | 1984-1988 | Coronial records     | 34  | Unselected adults               | 5  | 620 |
| Davies et al. (2007) (23)   | Arnold Lodge medium secure unit, Leicester, England, UK             | 1983-2003 | Coronial records     | 113 | Medium secure forensic patients | 26 | 507 |
| De Leo & Heller             | Gold Coast Hospital,                                                | 2002-2005 | Not specified        | 12  | Previous suicide                | 0  | 0   |

|                                 |                                                                                               |           |                  |     |                   |      |        |
|---------------------------------|-----------------------------------------------------------------------------------------------|-----------|------------------|-----|-------------------|------|--------|
| (2007) (24)                     | Queensland, Australia                                                                         |           |                  |     | attempters        |      |        |
| Deisenhammer et al. (2016) (25) | Three psychiatric hospitals, Tyrol, Austria                                                   | 2004-2011 | Not specified    | 3   | Unselected adults | 89   | 135.56 |
| Desai et al. (2008) (26)        | All psychiatric inpatient units in the Department of Veterans Affairs health care system, USA | 1994-1999 | Coronial records | 36  | Veterans          | 1057 | 296    |
| Donnelly et al. (1996) (27)     | Six psychiatric hospitals, Northern Ireland, UK                                               | 1990-1994 | Not specified    | 24  | Unselected adults | 0    | 0      |
| Donnelly et al. (1997) (28)     | Six psychiatric hospitals, Northern Ireland, UK                                               | 1987-1993 | Not specified    | 54  | Long stay         | 3    | 211    |
| Eastwood et al. (1982) (29)     | Inpatient psychiatric facilities Metropolitan Toronto,                                        | 1969-1978 | Coronial records | 114 | Unselected adults | 26   | 191    |

|                                 |                                                                                            |           |                  |     |                          |      |     |
|---------------------------------|--------------------------------------------------------------------------------------------|-----------|------------------|-----|--------------------------|------|-----|
|                                 | Canada                                                                                     |           |                  |     |                          |      |     |
| Engqvist & Rydelius (2006) (30) | All psychiatric facilities in Sweden                                                       | 1975-2002 | Coronial records | 240 | Children and adolescents | 9    | 158 |
| Furlan et al. (2009) (31)       | Collegno and Grugliasco , psychiatric hospitals, Turin, Italy                              | 1998-2002 | Not specified    | 48  | Long-stay patients       | 0    | 0   |
| Geddes et al. (1997) (32)       | All psychiatric hospitals, Scotland, UK                                                    | 1968-1993 | Coronial records | 12  | Unselected adults        | 2311 | 541 |
| Goldacre et al. (1993) (33)     | Hospitals within the Oxford Regional Health Authority, UK                                  | 1979-1986 | Coronial records | 12  | Unselected adults        | 134  | 770 |
| Goldston et al. (2001) (34)     | Adolescent Inpatient Psychiatry Unit of Wake Forest University Baptist Medical Center, USA | 1991-1998 | Not specified    | 48  | Adolescents              | 0    | 0   |

|                                      |                                                                                     |           |                  |     |                            |     |      |
|--------------------------------------|-------------------------------------------------------------------------------------|-----------|------------------|-----|----------------------------|-----|------|
| Hansen et al. (2001) (35)            | Asgard Hospital, counties Troms and Finnmark, Norway                                | 1980-1992 | Coronial records | 69  | Unselected adults          | 73  | 637  |
| Hayashi et al. (2012) (36)           | Tokyo Metropolitan Matsuzawa Hospital, Japan                                        | 2006-2009 | Not specified    | 24  | Admitted suicidal patients | 6   | 2830 |
| Healy et al. (2006) (37)             | Unspecified hospitals, North Wales UK                                               | 1994-2003 | Coronial records | 60  | Psychosis                  | 13  | 847  |
| Herpertz-Dahlmann et al. (2001) (38) | Department of Child and Adolescent Psychiatry of the University of Marburg, Germany | 1985-1996 | Not specified    | 120 | Anorexia nervosa           | 0   | 0    |
| Ho (2003) (39)                       | All psychiatric facilities in Hong Kong, China                                      | 1997-2000 | Coronial records | 12  | Unselected adults          | 333 | 764  |
| Hobbs et al. (2002) (40)             | Gladesville Hospital, Sydney,                                                       | 1993-2002 | Not specified    | 72  | Long-stay                  | 0   | 0    |

|                                        |                                                     |           |                  |     |                                   |    |     |
|----------------------------------------|-----------------------------------------------------|-----------|------------------|-----|-----------------------------------|----|-----|
|                                        | Australia                                           |           |                  |     |                                   |    |     |
| Hoffmann & Modestin (1987) (41)        | Psychiatric University Clinic of Berne, Switzerland | 1971-1981 | Coronial records | 12  | Unselected adults                 | 53 | 473 |
| Høyve et al. (2011) (42)               | University Hospital of North Norway, Norway         | 1980-2006 | Coronial records | 176 | Schizophrenia                     | 49 | 304 |
| Høyve et al. (2013) (43)               | University Hospital of North Norway, Norway         | 1980-2006 | Coronial records | 139 | Personality disorders             | 22 | 332 |
| Jamieson & Taylor (2005)(44)           | High security hospitals, England and Wales, UK      | 1984-2001 | Coronial records | 59  | High security patients            | 6  | 303 |
| Jones et al. (2011) (45)               | High security hospitals, England, UK                | 1972-2000 | Coronial records | 138 | High security patients            | 55 | 110 |
| Kessler et al. (2015) (46)             | US Army psychiatric facilities, USA                 | 2004-2009 | Coronial records | 12  | Army psychiatric patients         | 68 | 264 |
| Kittirattanapairoon et al. (2010) (47) | Suan Prung Psychiatric Hospital,                    | 2000-2007 | Coronial records | 78  | Methamphetamine induced psychosis | 33 | 455 |

|                              |                                                                                            |           |                  |     |                             |     |     |
|------------------------------|--------------------------------------------------------------------------------------------|-----------|------------------|-----|-----------------------------|-----|-----|
|                              | Thailand                                                                                   |           |                  |     |                             |     |     |
| Kjelsberg et al. (1994) (48) | Adolescent Clinic at the National Center for Child and Adolescent Psychiatry, Oslo, Norway | 1963-1991 | Coronial records | 180 | Adolescents                 | 35  | 129 |
| Kuo et al. (2010) (49)       | Taipei City Psychiatric Center, Taiwan                                                     | 1998-2007 | Coronial records | 66  | Unselected adults           | 250 | 412 |
| Kuperman et al. (1988) (50)  | University of Iowa Psychiatric Hospital, Iowa City, USA                                    | 1970-1985 | Coronial records | 110 | Adolescents                 | 12  | 99  |
| Lawrence et al. (1999) (51)  | All psychiatric facilities in Western Australia, Australia                                 | 1980-1996 | Coronial records | 90  | Unselected adults           | 471 | 120 |
| Lee & Lin (2009) (52)        | All psychiatric facilities in Taiwan                                                       | 2001-2005 | Coronial records | 3   | Schizophrenia               | 88  | 464 |
| Lindelius et al. (1974) (53) | St. Göran's Hospital, Sweden                                                               | 1962-1971 | Coronial records | 84  | Alcoholism or alcohol abuse | 10  | 598 |

|                                  |                                                           |           |                  |     |                                                                                                          |     |      |
|----------------------------------|-----------------------------------------------------------|-----------|------------------|-----|----------------------------------------------------------------------------------------------------------|-----|------|
| Links et al. (2012) (54)         | St Michael's Hospital, Toronto, Canada                    | 2007-2009 | Not specified    | 6   | Previous suicidal behaviour or ideation                                                                  | 3   | 5000 |
| Luxton et al. (2013) (55)        | US Military treatment facilities, USA                     | 2001-2011 | Coronial records | 37  | US service members                                                                                       | 154 | 72   |
| Maden et al. (1999) (56)         | Denis Hill Unit of the Bethlem Royal Hospital, London, UK | 1980-1994 | Not specified    | 79  | Medium secure forensic patients                                                                          | 8   | 580  |
| Madsen & Nordentoft (2013) (57)  | All psychiatric facilities in Denmark                     | 1998-2006 | Coronial records | 3   | Unselected adults                                                                                        | 585 | 1116 |
| Mastroeni et al. (2005) (58)     | Como Mental Hospital, Italy                               | 1997-2002 | Study follow-up  | 60  | Unselected adults                                                                                        | 0   | 0    |
| McGlashan & Heinssen (1988) (59) | Chestnut Lodge, Maryland, USA                             | 1950-1980 | Not specified    | 180 | Schizophrenia, schizoaffective disorder, borderline personality disorder and unipolar affective disorder | 13  | 377  |
| Meloni et al. (2006)             | All eight psychiatric                                     | 1987-2002 | Coronial records | 138 | Unselected adults                                                                                        | 52  | 537  |

|                             |                                                                            |           |                                 |     |                                      |     |      |
|-----------------------------|----------------------------------------------------------------------------|-----------|---------------------------------|-----|--------------------------------------|-----|------|
| (60)                        | care units in the province of Florence, Italy                              |           |                                 |     |                                      |     |      |
| Menezes & Mann (1996) (61)  | Sistema Descentralizado e Unificado de Saúde - Região 6, Sao Paulo, Brazil | 1991-1993 | Study follow-up                 | 24  | Psychosis                            | 4   | 1724 |
| Miller et al. (2008) (62)   | All psychiatric facilities in Ohio, USA                                    | 1998-2004 | Coronial records                | 30  | Unselected adults                    | 108 | 216  |
| Möller et al. (1982) (63)   | Max Planck Institute of Psychiatry, Munich, Germany                        | 1972-1980 | Not specified                   | 66  | Schizophrenia and paranoid psychoses | 5   | 883  |
| Motto & Bostrom (2001) (64) | Nine mental health facilities, San Francisco, California, USA              | 1969-1978 | Coronial records                | 180 | Suicidal or depressive states        | 249 | 552  |
| Naik et al. (1997) (65)     | Saxondale Hospital, Nottinghamshire, England,                              | 1974-1992 | Local registers and NHS central | 192 | Unselected adults                    | 0   | 0    |

|                                 |                                            |               |                  |      |                         |      |      |
|---------------------------------|--------------------------------------------|---------------|------------------|------|-------------------------|------|------|
|                                 | UK                                         |               | register         |      |                         |      |      |
| Ng & Leung (2000) (66)          | Castle Peak Hospital, Hong Kong China      | 1993-1998     | Not specified    | 60   | Unselected adults       | 0    | 0    |
| Opjordsmoe n et al. (2010) (67) | 3 sites in Denmark, one in Norway          | 1997-2002     | Not specified    | 24   | First episode psychosis | 5    | 1152 |
| Ösby (2001) (68)                | All psychiatric facilities in Sweden       | 1973-1995     | Coronial records | 1268 | Affective disorders     | 3184 | 560  |
| Owen et al. (1997) (69)         | Manly Hospital, New South Wales, Australia | Not specified | Not specified    | 6    | Unselected adults       | 4    | 6250 |
| Park et al. (2013) (70)         | Asan Medical Center, Seoul, South Korea    | 1989-2006     | Coronial records | 108  | Unselected adults       | 96   | 1152 |
| Park et al. (2013) (71)         | Asan Medical Center, Seoul, South Korea    | 1995-2009     | Coronial records | 12   | Adolescents             | 14   | 199  |
| Park et al. (2015) (72)         | Seoul National University Hospital,        | 1999-2010     | Coronial records | 72   | Adolescents             | 4    | 92   |

|                             |                                                                          |               |                  |     |                                  |      |      |
|-----------------------------|--------------------------------------------------------------------------|---------------|------------------|-----|----------------------------------|------|------|
|                             | South Korea                                                              |               |                  |     |                                  |      |      |
| Park et al. (2015) (73)     | Psychiatric patients of unspecified general hospital, Seoul, South Korea | 1995-2009     | Coronial records | 102 | Unselected adults                | 194  | 322  |
| Pedersen et al. (2014) (74) | All psychiatric facilities in Denmark                                    | 2005-2010     | Coronial records | 12  | Schizophrenia                    | 64   | 657  |
| Peuskens et al. (1996) (75) | Unspecified psychiatric unit, Belgium                                    | 1981-1994     | Not specified    | 72  | Schizophrenia                    | 27   | 896  |
| Pirkola et al. (2007) (76)  | All psychiatric facilities in Finland                                    | 1985-2001     | Coronial records | 12  | Unselected adults                | 3841 | 1082 |
| Pokorny (1983) (77)         | Houston Veterans Administration Medical Centre, Texas, USA               | Not specified | Coronial records | 60  | Veterans administration patients | 67   | 279  |
| Politi et al. (2002) (78)   | In-patient psychiatric unit of Pavia, Italy                              | 1978-1999     | Coronial records | 124 | Unselected adults                | 46   | 207  |

|                             |                                                                                                      |               |                  |     |                                            |    |      |
|-----------------------------|------------------------------------------------------------------------------------------------------|---------------|------------------|-----|--------------------------------------------|----|------|
| Qurashi et al. (2006) (79)  | Unspecified hospital, Manchester, England, UK                                                        | Not specified | Not specified    | 3   | Unselected adults                          | 1  | 5797 |
| Remberk et al. (2014) (80)  | Department of Child and Adolescent Psychiatry, Institute of Psychiatry and Neurology, Warsaw, Poland | 1998-2011     | Not specified    | 96  | Adolescent onset schizophrenia             | 2  | 158  |
| Robling et al. (2000) (81)  | Fulbourn Hospital, Cambridge, England, UK                                                            | 1970-1993     | Not specified    | 276 | Women with puerperal psychiatric illnesses | 2  | 106  |
| Ruengorn et al. (2011) (82) | Suan Prung Psychiatric Hospital, Chiang Mai, Thailand                                                | 2007-2010     | Hospital records | 12  | Mood disorders                             | 7  | 2979 |
| Rydelius (1984) (83)        | Unspecified department of child psychiatry, Stockholm, Sweden                                        | 1970-1981     | Coronial records | 72  | Children and adolescents                   | 15 | 207  |
| Sani et al.                 | Belvedere Montello                                                                                   | 1964-         | Coronial         | 210 | Unselected                                 | 91 | 117  |

|                              |                                                                                   |               |                                      |     |                                 |    |      |
|------------------------------|-----------------------------------------------------------------------------------|---------------|--------------------------------------|-----|---------------------------------|----|------|
| (2011) (84)                  | Hospital, Rome, Italy                                                             | 1998          | records                              |     | adults                          |    |      |
| Schneider et al. (2001) (85) | Unspecified psychiatric unit, Germany                                             | Not specified | Hospital records and study follow-up | 60  | Depression                      | 16 | 1143 |
| Seemuller et al. (2014) (86) | Twelve centres across Germany                                                     | Not specified | Study follow-up                      | 36  | Depression                      | 3  | 105  |
| Simpson et al. (2006) (87)   | Forensic Community team, New Zealand                                              | 1998-2006     | Not specified                        | 22  | Forensic patients               | 0  | 0    |
| Skeem et al. (2006) (88)     | Acute civil inpatient facilities in Pennsylvania, Missouri and Massachusetts, USA | Not specified | Study follow-up                      | 12  | Unselected adults               | 2  | 210  |
| Tabita et al. (2012) (89)    | Medium secure forensic psychiatric hospital, Örebro County, Sweden                | 1992-2008     | Coronial records                     | 113 | Medium secure forensic patients | 8  | 1351 |
| Tejedor et                   | Psychiatric                                                                       | 1983-         | Study                                | 120 | Suicide                         | 18 | 1200 |

|                                     |                                                                 |             |                  |     |                                       |    |      |
|-------------------------------------|-----------------------------------------------------------------|-------------|------------------|-----|---------------------------------------|----|------|
| al. (1999) (90)                     | Department of Santa Cruz y San Pablo Hospital, Barcelona, Spain | 1997        | follow-up        |     | attempters                            |    |      |
| Thomsen (1996) (91)                 | All psychiatric facilities, Denmark                             | 1970 – 1993 | Coronial records | 269 | Children and adolescents              | 8  | 65   |
| Thornicroft & Sartorius (1993) (92) | Unspecified hospital, Basle, Switzerland                        | 1972-1982   | Not specified    | 240 | Depression                            | 11 | 1038 |
| Thornicroft et al. (2005) (93)      | Three long term psychiatric institutions in London, UK          | 1990-1996   | Study follow-up  | 12  | Long stay patients with schizophrenia | 0  | 0    |
| Trieman et al. (1999) (94)          | Friern and Claybury Hospitals, England, UK                      | 1985-1998   | Study follow-up  | 60  | Long stay                             | 14 | 418  |
| Tseng et al. (2006) (95)            | Unspecified psychosomatic ward, Taiwan                          | 2000-2002   | Study follow-up  | 14  | Depression                            | 1  | 1279 |
| Welner et al. (1979) (96)           | Renard Hospital, Washington                                     | 1965-1976   | Study follow-up  | 113 | Adolescents                           | 6  | 829  |

|                             |                                                                                                |           |                  |     |                    |    |      |
|-----------------------------|------------------------------------------------------------------------------------------------|-----------|------------------|-----|--------------------|----|------|
|                             | University Medical Center, St Louis, USA                                                       |           |                  |     |                    |    |      |
| Wiersma et al. (1998) (97)  | Two provinces in the north of the Netherlands                                                  | 1978-1993 | Study follow-up  | 180 | Schizophrenia      | 9  | 732  |
| Winkler et al. (2015) (98)  | All psychiatric facilities, Czech Republic                                                     | 2006-2012 | Coronial records | 2   | Unselected adults  | 72 | 1626 |
| Zilber et al. (1989) (99)   | All psychiatric facilities, Israel                                                             | 1978-1983 | Coronial records | 60  | Unselected adults  | 35 | 42   |
| Zubenko et al. (1997) (100) | Geriatric Clinical Research Unit of Western Psychiatric Institute and Clinic, Pennsylvania USA | 1989-1995 | Coronial records | 37  | Geriatric patients | 3  | 71   |

#### eReferences

1. Ajetunmobi O, Taylor M, Stockton D, Wood R. Early death in those previously hospitalised for mental healthcare in Scotland: a nationwide cohort study, 1986–2010. *BMJ Open*. 2013;3(7):e002768.
2. Angst F, Stassen HH, Clayton PJ, Angst J. Mortality of patients with mood disorders: follow-up over 34–38 years. *Journal of affective disorders*. 2002;68(2):167-81.

3. Avery D, Winokur G. Mortality in depressed patients treated with electroconvulsive therapy and antidepressants. *Archives of general psychiatry*. 1976;33(9):1029-37.
4. Barbato A, Terzian E, Saraceno B, De Luca L, Tognoni G. Outcome of discharged psychiatric patients after short inpatient treatment: an Italian collaborative study. *Social psychiatry and psychiatric epidemiology*. 1992;27(4):192-7.
5. Bergen J, Hunt G, Armitage P, Bashir M. Six-month outcome following a relapse of schizophrenia. *Australian and New Zealand Journal of Psychiatry*. 2008;32(6):815-822
6. Berglund M, Nilsson K. Mortality in severe depression. *Acta Psychiatrica Scandinavica*. 1987;76(4):372-80.
7. Best KM, Hauser ST, Gralinski-Bakker JH, Allen JP, Crowell J. Adolescent psychiatric hospitalization and mortality, distress levels, and educational attainment: follow-up after 11 and 20 years. *Archives of pediatrics & adolescent medicine*. 2004;158(8):749-52.
8. Bjorkenstam C, Bjorkenstam E, Hjern A, Boden R, Reutfors J. Suicide in first episode psychosis: a nationwide cohort study. *Schizophr Res*. 2014;157(1-3):1-7.
9. Black DW, Warrack G, Winokur G. The Iowa record-linkage study: I. Suicides and accidental deaths among psychiatric patients. *Archives of General Psychiatry*. 1985;42(1):71-5.
10. Blumenthal S, Bell V, Neumann N-U, Schüttler R, Vogel R. Mortality and rate of suicide of first admission psychiatric patients. *Psychopathology*. 1989;22(1):50-6.
11. Brent DA, Kolko DJ, Wartella ME, BOYLAN MB, Moritz G, Baugher M, et al. Adolescent psychiatric inpatients' risk of suicide attempt at 6-month follow-up. *Journal of the American Academy of Child & Adolescent Psychiatry*. 1993;32(1):95-105.
12. Brodaty H, MacCuspie-Moore CM, Tickle L, Luscombe G. Depression, diagnostic sub-type and death: a 25 year follow-up study. *Journal of affective disorders*. 1997;46(3):233-42.
13. Burvill PW, Hall WD. Predictors of increased mortality in elderly depressed patients. *International journal of geriatric psychiatry*. 1994;9(3):219-27.
14. Castelein S, Liemburg EJ, de Lange JS, van Es FD, Visser E, Aleman A, et al. Suicide in Recent Onset Psychosis Revisited: Significant Reduction of Suicide Rate over the Last Two Decades - A Replication Study of a Dutch Incidence Cohort. *PLoS One*. 2015;10(6):e0129263.
15. Charrel CL, Plancke L, Genin M, Defromont L, Ducrocq F, Vaiva G, et al. Mortality of people suffering from mental illness: a study of a cohort of patients hospitalised in psychiatry in the north of France. *Soc Psychiatry Psychiatr Epidemiol*. 2015;50(2):269-77.
16. Chen WJ, Huang Y-J, Yeh L-L, Rin H, Hwu H-G. Excess mortality of psychiatric inpatients in Taiwan. *Psychiatry research*. 1996;62(3):239-50.
17. Choi JW, Park S, Yi KK, Hong JP. Suicide mortality of suicide attempt patients discharged from emergency room, nonsuicidal psychiatric patients discharged from emergency room, admitted suicide attempt patients, and admitted nonsuicidal psychiatric patients. *Suicide Life Threat Behav*. 2012;42(3):235-43.

18. Clark D, Young M, Scheftner W, Fawcett J, Fogg L. A field test of Motto's risk estimator for suicide. *American Journal of Psychiatry*. 1987;144(7):923-6.
19. Coid JW, Hickey N, Yang M. Comparison of outcomes following after-care from forensic and general adult psychiatric services. *The British Journal of Psychiatry*. 2007;190(6):509-14.
20. Craig TJ, Ye Q, Bromet EJ. Mortality among first-admission patients with psychosis. *Compr Psychiatry*. 2006;47(4):246-51.
21. Crisanti A, Love E. Mortality among involuntarily admitted psychiatric patients: a survival analysis. *Social psychiatry and psychiatric epidemiology*. 1999;34(12):627-33.
22. Curtis JL. Deaths Among Former Psychiatric. *Psychiatric Services*. 1996;47(4):398-402.
23. Davies S, Clarke M, Hollin C, Duggan C. Long-term outcomes after discharge from medium secure care: a cause for concern. *The British Journal of Psychiatry*. 2007;191(1):70-4.
24. De Leo D, Heller T. Intensive case management in suicide attempters following discharge from psychiatric care. *Australian journal of primary health*. 2007;13(3):49-58.
25. Deisenhammer EA, Behrndt E-M, Kemmler G, Haring C, Miller C. A comparison of suicides in psychiatric in-patients, after discharge and in not recently hospitalized individuals. *Comprehensive Psychiatry*. 2016;69:100-5.
26. Desai RA, Dausey D, Rosenheck RA. Suicide among discharged psychiatric inpatients in the Department of Veterans Affairs. *Military medicine*. 2008;173(8):721-8.
27. Donnelly M, McGilloway S, Mays N, Knapp M, Kavanagh S, Beecham J, et al. Leaving hospital: one and two-year outcomes of long-stay psychiatric patients discharged to the community. *Journal of Mental Health*. 1996;5(3):245-56.
28. Donnelly M, McGilloway S, Mays N, Perry S, Lavery C. A 3-to 6-year follow-up of former long-stay psychiatric patients in Northern Ireland. *Social psychiatry and psychiatric epidemiology*. 1997;32(8):451-8.
29. Eastwood MR, Stiasny S, Meier HR, Woogh CM. Mental illness and mortality. *Comprehensive Psychiatry*. 1982;23(4):377-85.
30. Engqvist U, Rydelius PA. Death and suicide among former child and adolescent psychiatric patients. *BMC Psychiatry*. 2006;6:51.
31. Furlan PM, Zuffranieri M, Stanga F, Ostacoli L, Patta J, Picci RL. Four-year follow-up of long-stay patients settled in the community after closure of Italy's psychiatric hospitals. *Psychiatric services*. 2009;60(9):1198-1202.
32. Geddes JR, Juszczak E, O'Brien F, Kendrick S. Suicide in the 12 months after discharge from psychiatric inpatient care, Scotland 1968-92. *Journal of epidemiology and community health*. 1997;51(4):430-4.
33. Goldacre M, Seagroatt V, Hawton K. Suicide after discharge from psychiatric inpatient care. *The Lancet*. 1993;342(8866):283-6.
34. Goldston DB, Daniel SS, Reboussin BA, Reboussin DM, Frazier PH, Harris AE. Cognitive risk factors and suicide attempts among formerly hospitalized adolescents: A prospective naturalistic study. *Journal of the American Academy of Child & Adolescent Psychiatry*. 2001;40(1):91-9.
35. Hansen V, Jacobsen BK, Arnesen E. Cause-specific mortality in psychiatric patients after deinstitutionalisation. *The British Journal of Psychiatry*. 2001;179(5):438-43.

36. Hayashi N, Igarashi M, Imai A, Yoshizawa Y, Utsumi K, Ishikawa Y, et al. Post-hospitalization course and predictive signs of suicidal behavior of suicidal patients admitted to a psychiatric hospital: a 2-year prospective follow-up study. *BMC psychiatry*. 2012;12(1):1.
37. Healy D, Harris M, Tranter R, Gutting P, Austin R, Jones-Edwards G, et al. Lifetime suicide rates in treated schizophrenia: 1875–1924 and 1994–1998 cohorts compared. *The British Journal of Psychiatry*. 2006;188(3):223-8.
38. Herpertz-Dahlmann B, Müller B, Herpertz S, Heussen N, Hebebrand J, Remschmidt H. Prospective 10-year follow-up in adolescent anorexia nervosa—course, outcome, psychiatric comorbidity, and psychosocial adaptation. *Journal of Child Psychology and Psychiatry*. 2001;42(5):603-12.
39. Ho T-P. The suicide risk of discharged psychiatric patients. *The Journal of clinical psychiatry*. 2003;64(6):702-7.
40. Hobbs C, Newton L, Tennant C, Rosen A, Tribe K. Deinstitutionalization for long-term mental illness: a 6-year evaluation. *Australian and New Zealand Journal of Psychiatry*. 2002;36(1):60-6.
41. Hoffmann H, Modestin J. Completed suicide in discharged psychiatric inpatients. *Social psychiatry*. 1987;22(2):93-8.
42. Høy A, Jacobsen BK, Hansen V. Increasing mortality in schizophrenia: are women at particular risk? A follow-up of 1111 patients admitted during 1980-2006 in Northern Norway. *Schizophr Res*. 2011;132(2-3):228-32.
43. Høy A, Jacobsen BK, Hansen V. Sex differences in mortality of admitted patients with personality disorders in North Norway—a prospective register study. *BMC psychiatry*. 2013;13(1):1.
44. Jamieson L, Taylor PJ. Patients Leaving English High Security Hospitals: Do Discharge Cohorts and Their Progress Change Over Time? *International Journal of Forensic Mental Health*. 2005;4(1):71-87.
45. Jones RM, Hales H, Butwell M, Ferriter M, Taylor PJ. Suicide in high security hospital patients. *Soc Psychiatry Psychiatr Epidemiol*. 2011;46(8):723-31.
46. Kessler RC, Warner CH, Ivany C, Petukhova MV, Rose S, Bromet EJ, et al. Predicting suicides after psychiatric hospitalization in US Army soldiers: the Army Study To Assess Risk and resilience in Servicemembers (Army STARRS). *JAMA Psychiatry*. 2015;72(1):49-57.
47. Kittirattanapaiboon P, Mahatnirunkul S, Booncharoen H, Thummawong P, Dumrongchai U, Chutha W. Long-term outcomes in methamphetamine psychosis patients after first hospitalisation. *Drug Alcohol Rev*. 2010;29(4):456-61.
48. Kjelsberg E, Neegaard E, Dahl A. Suicide in adolescent psychiatric inpatients: incidence and predictive factors. *Acta Psychiatrica Scandinavica*. 1994;89(4):235-41.
49. Kuo C-J, Tsai S-Y, Liao Y-T, Lee W-C, Sung X-W, Chen C-C. Psychiatric discharge against medical advice is a risk factor for suicide but not for other causes of death. *The Journal of clinical psychiatry*. 2010;71(6):808-9.
50. Kuperman S, Black DW, Burns TL. Excess mortality among formerly hospitalized child psychiatric patients. *Archives of general psychiatry*. 1988;45(3):277-82.

51. Lawrence DM, Holman CAJ, Jablensky AV, Fuller SA. Suicide rates in psychiatric in-patients: an application of record linkage to mental health research. *Australian and New Zealand Journal of Public Health*. 1999;23(5):468-70.
52. Lee HC, Lin HC. Are psychiatrist characteristics associated with postdischarge suicide of schizophrenia patients? *Schizophr Bull*. 2009;35(4):760-5.
53. Lindelius R, Salum I, Ågren G. Mortality among male and female alcoholic patients treated in a psychiatric unit. *Acta Psychiatrica Scandinavica*. 1974;50(6):612-8.
54. Links P, Nisenbaum R, Ambreen M, Balderson K, Bergmans Y, Eynan R, et al. Prospective study of risk factors for increased suicide ideation and behavior following recent discharge. *Gen Hosp Psychiatry*. 2012;34(1):88-97.
55. Luxton DD, Trofimovich L, Clark LL. Suicide risk among US Service members after psychiatric hospitalization, 2001-2011. *Psychiatr Serv*. 2013;64(7):626-9.
56. Maden A, Rutter S, McClintock T, Friendship C, Gunn J. Outcome of admission to a medium secure psychiatric unit. I. Short-and long-term outcome. *The British Journal of Psychiatry*. 1999;175(4):313-6.
57. Madsen T, Nordentoft M. Changes in inpatient and postdischarge suicide rates in a nationwide cohort of Danish psychiatric inpatients, 1998-2005. *J Clin Psychiatry*. 2013;74(12):e1190-4.
58. Mastroeni A, Bellotti C, Pellegrini E, Galletti F, Lai E, Falloon IR. Clinical and social outcomes five years after closing a mental hospital: a trial of cognitive behavioural interventions. *Clinical practice and epidemiology in mental health : CP & EMH*. 2005;1:25.
59. McGlashan TH, Heinssen RK. Hospital discharge status and long-term outcome for patients with schizophrenia, schizoaffective disorder, borderline personality disorder, and unipolar affective disorder. *Archives of general psychiatry*. 1988;45(4):363-8.
60. Meloni D, Miccinesi G, Bencini A, Conte M, Crocetti E, Zappa M, et al. Mortality among discharged psychiatric patients in Florence, Italy. *Psychiatric Services*. 2006;57(10):1474-81.
61. Menezes PR, Mann AH. Mortality among patients with non-affective functional psychoses in a metropolitan area of south-eastern Brazil. *Revista de saude publica*. 1996;30(4):304-9.
62. Miller BJ, Paschall III CB, Svendsen DP. Mortality and medical comorbidity among patients with serious mental illness. *Psychiatr Serv*. 2008;6(2):239-45.
63. Möller H-J, von Zerssen D, Werner-Eilert K, Wüschner-Stockheim M. Outcome in schizophrenic and similar paranoid psychoses. *Schizophrenia Bulletin*. 1982;8(1):99.
64. Motto JA, Bostrom AG. A randomized controlled trial of postcrisis suicide prevention. *Psychiatric services*. 2001;52(6):828-33.
65. Naik PC, Davies S, Buckley AM, Lee AS. Long-term mortality after first psychiatric admission. *The British Journal of Psychiatry*. 1997;170(1):43-6.
66. Ng R, Leung S. A 5-year outcome study of chronically ill psychiatric patients in Hong Kong. *Hong Kong Journal of Psychiatry*. 2000;10(3):27-36.
67. Opjordsmoen S, Friis S, Melle I, Haahr U, Johannessen JO, Larsen TK, et al. A 2-year follow-up of involuntary admission's influence upon adherence and outcome in first-episode psychosis. *Acta Psychiatr Scand*. 2010;121(5):371-6.

68. Ösby U, Brandt L, Correia N, Ekblom A, Sparén P. Excess mortality in bipolar and unipolar disorder in Sweden. *Archives of general psychiatry*. 2001;58(9):844-50.
69. Owen C, Rutherford V, Jones M, Tennant C, Smallman A. I. Psychiatric rehospitalization following hospital discharge. *Community mental health journal*. 1997;33(1):13-24.
70. Park S, Choi JW, Kyoung Yi K, Hong JP. Suicide mortality and risk factors in the 12 months after discharge from psychiatric inpatient care in Korea: 1989-2006. *Psychiatry Res*. 2013;208(2):145-50.
71. Park S, Kim CY, Hong JP. Unnatural causes of death and suicide among former adolescent psychiatric patients. *The Journal of adolescent health : official publication of the Society for Adolescent Medicine*. 2013;52(2):207-11.
72. Park S, Kim JW, Kim BN, Bae JH, Shin MS, Yoo HJ, et al. Clinical characteristics and precipitating factors of adolescent suicide attempters admitted for psychiatric inpatient care in South Korea. *Psychiatry Investig*. 2015;12(1):29-36.
73. Park S, Kim SY, Hong JP. Cause-specific mortality of psychiatric inpatients and outpatients in a general hospital in Korea. *Asia-Pacific journal of public health / Asia-Pacific Academic Consortium for Public Health*. 2015;27(2):164-75.
74. Pedersen CG, Jensen SOW, Gradus J, Johnsen SP, Mainz J. Systematic suicide risk assessment for patients with schizophrenia: a national population-based study. *Psychiatric services*. 2014;56(2):226-231.
75. Peuskens J, De Hert M, Cosyns P, Pieters G, Theys P, Vermote R. Suicide in young schizophrenic patients during and after inpatient treatment. *International Journal of Mental Health*. 1996;25(4):39-44.
76. Pirkola S, Sohlman B, Heilä H, Wahlbeck K. Reductions in postdischarge suicide after deinstitutionalization and decentralization: a nationwide register study in Finland. *Psychiatric Services*. 2007;58(2):221-216.
77. Pokorny AD. Prediction of suicide in psychiatric patients: report of a prospective study. *Archives of general psychiatry*. 1983;40(3):249-57.
78. Politi P, Piccinelli M, Klersy C, Madini S, Segagni Lusignani G, Fratti C, et al. Mortality in psychiatric patients 5 to 21 years after hospital admission in Italy. *Psychological Medicine*. 2002;32(02):227-37.
79. Qurashi I, Kapur N, Appleby L. A prospective study of noncompliance with medication, suicidal ideation, and suicidal behavior in recently discharged psychiatric inpatients. *Arch Suicide Res*. 2006;10(1):61-7.
80. Remberk B, Bazynska AK, Krempa-Kowalewska A, Rybakowski F. Adolescent insanity revisited: course and outcome in early-onset schizophrenia spectrum psychoses in an 8-year follow-up study. *Compr Psychiatry*. 2014;55(5):1174-81.
81. Robling S, Paykel E, Dunn V, Abbott R, Katona C. Long-term outcome of severe puerperal psychiatric illness: a 23 year follow-up study. *Psychological Medicine*. 2000;30(06):1263-71.
82. Ruengorn C, Sanichwankul K, Niwatananun W, Mahatnirunkul S, Pumpaisalchai W, Patumanond J. Incidence and risk factors of suicide reattempts within 1 year after psychiatric hospital discharge in mood disorder patients. *Clin Epidemiol*. 2011;3:305-13.

83. Rydelius PA. Deaths among child and adolescent psychiatric patients. *Acta Psychiatrica Scandinavica*. 1984;70(2):119-26.
84. Sani G, Tondo L, Koukopoulos A, Reginaldi D, Kotzalidis GD, Koukopoulos AE, et al. Suicide in a large population of former psychiatric inpatients. *Psychiatry Clin Neurosci*. 2011;65(3):286-95.
85. Schneider B, Philipp M, Müller M. Psychopathological predictors of suicide in patients with major depression during a 5-year follow-up. *European Psychiatry*. 2001;16(5):283-8.
86. Seemuller F, Meier S, Obermeier M, Musil R, Bauer M, Adli M, et al. Three-Year long-term outcome of 458 naturalistically treated inpatients with major depressive episode: severe relapse rates and risk factors. *Eur Arch Psychiatry Clin Neurosci*. 2014;264(7):567-75.
87. Simpson AI, Jones RM, Evans C, McKenna B. Outcome of patients rehabilitated through a New Zealand forensic psychiatry service: A 7.5 year retrospective study. *Behavioral sciences & the law*. 2006;24(6):833-43.
88. Skeem JL, Silver E, Aippelbaum PS, Tiemann J. Suicide-related behavior after psychiatric hospital discharge: Implications for risk assessment and management. *Behavioral sciences & the law*. 2006;24(6):731-46.
89. Tabita B, de Santi MG, Kjellin L. Criminal recidivism and mortality among patients discharged from a forensic medium secure hospital. *Nord J Psychiatry*. 2012;66(4):283-9.
90. Tejedor M, Diaz A, Castillon J, Pericay J. Attempted suicide: repetition and survival findings of a follow-up study. *Acta Psychiatrica Scandinavica*. 1999;100(3):205-11.
91. Thomsen P. A 22-to 25-year follow-up study of former child psychiatric patients: a register-based investigation of the course of psychiatric disorder and mortality in 546 Danish child psychiatric patients. *Acta Psychiatrica Scandinavica*. 1996;94(6):397-403.
92. Thornicroft G, Sartorius N. The course and outcome of depression in different cultures: 10-year follow-up of the WHO Collaborative Study on the Assessment of Depressive Disorders. *Psychological medicine*. 1993;23(04):1023-32.
93. Thornicroft G, Bebbington P, Leff J. Outcomes for long-term patients one year after discharge from a psychiatric hospital. *Psychiatric Services*. 2005;56(11):1416-22.
94. Trieman N, Leff J, Glover G. Outcome of long stay psychiatric patients resettled in the community: prospective cohort study. *BMJ*. 1999;319(7201):13-6.
95. Tseng M-C, Cheng I-C, Lee Y-J, Lee M-B. Intermediate-term outcome of psychiatric inpatients with major depression. *J Formos Med Assoc*. 2006;105(8):645-52.
96. Welner A, Welner Z, Fishman R. Psychiatric adolescent inpatients: Eight-to ten-year follow-up. *Archives of General Psychiatry*. 1979;36(6):698-700.
97. Wiersma D, Nienhuis FJ, Slooff CJ, Giel R. Natural course of schizophrenic disorders: a 15-year followup of a Dutch incidence cohort. *Schizophrenia Bulletin*. 1998;24(1):75.
98. Winkler P, Mlada K, Csemy L, Nechanska B, Hoschl C. Suicides following inpatient psychiatric hospitalization: A nationwide case control study. *J Affect Disord*. 2015;184:164-9.

99. Zilber N, Schufman N, Lerner Y. Mortality among psychiatric patients-the groups at risk. *Acta Psychiatrica Scandinavica*. 1989;79(3):248-56.
100. Zubenko GS, Mulsant BH, Sweet RA, Pasternak RE, Tu XM. Mortality of elderly patients with psychiatric disorders. *American Journal of Psychiatry*. 1997;154(10):1360-8.

**eTable 2.** Excluded Studies

|   |                              |
|---|------------------------------|
| 1 | Allebeck (1986) (1)          |
| 2 | Allugander (1992) (2)        |
| 3 | Appleby (1998) (3)           |
| 4 | Beck (1989) (4)              |
| 5 | Belfrage (1994) (5)          |
| 6 | Black (1985) (6)             |
| 7 | Black (1986) (7)             |
| 8 | Black (1987) (8)             |
| 9 | Brodersen (2000) (9)         |
| 1 | Buchholtz-Hansen (1993) (10) |
| 1 | Carlborg (2008) (11)         |
| 1 | Dayson (1993) (12)           |
| 1 | Engberg (1984) (13)          |
| 1 | Erlangsen (2006) (14)        |
| 1 | Geddes (1995) (15)           |
| 1 | Goldstein (1991) (16)        |
| 1 | Goldston (1999) (17)         |
| 1 | Hansen (1997) (18)           |
| 1 | Hintikka (1997) (19)         |
| 2 | Ho (2006) (20)               |
| 2 | Honkonen (2008) (21)         |
| 2 | Høyer (2004) (22)            |
| 2 | Isometsa (2014) (23)         |

|   |                              |
|---|------------------------------|
| 2 | Ivarsson (1998) (24)         |
| 2 | Johansson (1996) (25)        |
| 2 | Johansson (1997) (26)        |
| 2 | Johnsson Fridell (1996) (27) |
| 2 | Kessing (2004) (28)          |
| 2 | Kjelsberg (1999) (29)        |
| 3 | Modestin (1989) (30)         |
| 3 | Mortensen (1993) (31)        |
| 3 | Motto (1985) (32)            |
| 3 | Motto (1990) (33)            |
| 3 | Nielsen (1990) (34)          |
| 3 | Nyman (1986) (35)            |
| 3 | Salokangas (2002) (37)       |
| 3 | Sohlman (1999) (38)          |
| 3 | Stark (2003) (39)            |
| 3 | Tsai (2002) (40)             |
| 4 | Valenstein (2009) (41)       |
| 4 | Weeke (1986) (42)            |
| 4 | Yim (2004) (43)              |

eReferences

1. Allebeck P, Wistedt B. Mortality in schizophrenia: a ten-year follow-up based on the Stockholm County inpatient register. *Archives of General Psychiatry*. 1986;43(7):650-3.
2. Allgulander C, Allebeck P, Przybeck TR, Rice JP. Risk of suicide by psychiatric diagnosis in Stockholm County. *European archives of psychiatry and clinical neuroscience*. 1992;241(5):323-6.

3. Appleby L, Mortensen PB, Faragher EB. Suicide and other causes of mortality after post-partum psychiatric admission. *The British Journal of Psychiatry*. 1998;173(3):209-11.
4. Beck AT, Brown G, Steer RA. Prediction of eventual suicide in psychiatric inpatients by clinical ratings of hopelessness. *Journal of consulting and clinical psychology*. 1989;57(2):309.
5. Belfrage H. Criminality and mortality among a cohort of former mental patients in Sweden. *Nordic Journal of Psychiatry*. 2009;48(5):343-7.
6. Black DW, Warrack G, Winokur G. Excess mortality among psychiatric patients. The Iowa record-linkage study. *Journal of the American Medical Association*. 1985;253(1):58-61.
7. Black DW, Winokur G. Prospective studies of suicide and mortality in psychiatric patients. *Annals of the New York Academy of Sciences*. 1986;487:106-13.
8. Black DW, Winokur G, Nasrallah A. Is death from natural causes still excessive in psychiatric patients? A follow-up of 1593 patients with major affective disorder. *Journal of Nervous and Mental Disease*. 1987;175(11):674-80.
9. Brodersen A, Licht RW, Vestergaard P, Olesen AV, Mortensen PB. Sixteen-year mortality in patients with affective disorder commenced on lithium. *The British Journal of Psychiatry*. 2000;176(5):429-33.
10. Buchholtz-Hansen PE, Wang AG, Kragh-Sørensen P. Mortality in major affective disorder: relationship to subtype of depression. *Acta Psychiatrica Scandinavica*. 1993;87(5):329-35.
11. Carlborg A, Jokinen J, Jonsson EG, Nordstrom AL, Nordstrom P. Long-term suicide risk in schizophrenia spectrum psychoses: survival analysis by gender. *Arch Suicide Res*. 2008;12(4):347-51.
12. Dayson D. The TAPS Project. 12: Crime, vagrancy, death and readmission of the long-term mentally ill during their first year of local reprovion. *The British Journal of Psychiatry*. 1993;Supplement, (19):40-4.
13. Engberg M. Mortality and suicide rates of involuntarily committed patients. *Acta Psychiatrica Scandinavica*. 1994;89(1):35-40.
14. Erlangsen A, Zarit SH, Tu X, Conwell Y. Suicide among older psychiatric inpatients: an evidence-based study of a high-risk group. *The American journal of geriatric psychiatry*. 2006;14(9):734-41.
15. Geddes JR, Juszczak E. Period trends in rate of suicide in first 28 days after discharge from psychiatric hospital in Scotland, 1968-92. *Bmj*. 1995;311(7001):357-60.
16. Goldstein RB, Black DW, Nasrallah A, Winokur G. The prediction of suicide: sensitivity, specificity, and predictive value of a multivariate model applied to suicide among 1906 patients with affective disorders. *Archives of general psychiatry*. 1991;48(5):418-22.
17. Goldston DB, Daniel SS, Reboussin DM, Reboussin BA, Frazier PH, Kelley AE. Suicide attempts among formerly hospitalized adolescents: A prospective naturalistic study of risk during the first 5 years alter discharge. *Journal of the American Academy of Child and Adolescent Psychiatry*. 1999;38(6):660-71.
18. Hansen V, Arnesen E, Jacobsen BK. Total mortality in people admitted to a psychiatric hospital. *The British Journal of Psychiatry*. 1997 Feb;170(2):186-90.

19. Hintikka J, Antjkainen R, Lehtonen J. Can post discharge suicide attempts of non psychotic inpatients be predicted? *Nordic Journal of Psychiatry*. 2009;51(6):409-13.
20. Ho TP. Duration of hospitalization and post discharge suicide. *Suicide and Life-Threatening Behavior*. 2006;36(6):682-6.
21. Honkonen H, Mattila AK, Lehtinen K, Elo T, Haataja R, Joukamaa M. Mortality of Finnish acute psychiatric hospital patients. *Soc Psychiatry Psychiatr Epidemiol*. 2008 Aug;43(8):660-6.
22. Høyer EH, Olesen AV, Mortensen PB. Suicide risk in patients hospitalised because of an affective disorder: a follow-up study, 1973–1993. *Journal of Affective Disorders*. 2004;78(3):209-17.
23. Isometsa E, Sund R, Pirkola S. Post-discharge suicides of inpatients with bipolar disorder in Finland. *Bipolar Disord*. 2014 Dec;16(8):867-74. PubMed PMID: 25056223.
24. Ivarsson T, Larsson B, Gillberg C. A 2–4 year follow up of depressive symptoms, suicidal ideation, and suicide attempts among adolescent psychiatric inpatients. *European child & adolescent psychiatry*. 1998;7(2):96-104.
25. Johansson LM, Johansson S-E, Sundquist J, Bergman B. Suicide among psychiatric in-patients in Stockholm, Sweden. *Archives of Suicide Research*. 1996;2(3):171-81.
26. Johansson LM, Johansson SE, Bergman B, Sundquist J. Suicide, ethnicity and psychiatric in-patient care: A case-control study. *Archives of Suicide Research*. 1997;3(4):253-69.
27. Johnsson Fridell E, Öjehagen A, Träskman-Bendz I. A 5-year follow-up study of suicide attempts. *Acta Psychiatrica Scandinavica*. 1996;93(3):151-7.
28. Kessing LV, Munk-Jorgensen P. Does type of first contact in depressive and bipolar disorders predict subsequent hospitalisation and risk of suicide? *J Affect Disord*. 2004 Nov 15;83(1):65-71.
29. Kjelsberg E, Sandvik L, Dahl AA. A long-term follow-up study of adolescent psychiatric in-patients. Part I. Predictors of early death. *Acta Psychiatrica Scandinavica*. 1999;99(4):231-6.
30. Modestin J, Hoffmann H. Completed suicide in psychiatric inpatients and former inpatients A comparative study. *Acta Psychiatrica Scandinavica*. 1989;79(3):229-34.
31. Mortensen PB, Juel K. Mortality and causes of death in first admitted schizophrenic patients. *The British Journal of Psychiatry*. 1993;163(2):183-9.
32. Motto J, Heilbron D, Juster R. Development of a clinical instrument to estimate suicide risk. *Am J Psychiatry*. 1985;142(6):680-6.
33. Motto JA, Bostrom A. Empirical indicators of near-term suicide risk. *Crisis: The Journal of Crisis Intervention and Suicide Prevention*. 1990.
34. Nielsen B, Wang A, Brille-Brahe U. Attempted suicide in Denmark. IV. A five-year follow-up. *Acta Psychiatrica Scandinavica*. 1990;81(3):250-4.
35. Nyman AK, Jonsson H. Patterns of self-destructive behaviour in schizophrenia. *Acta Psychiatrica Scandinavica*. 1986;73(3):252-62.
35. Salokangas RK, Honkonen T, Stengård E, Koivisto A-M. Mortality in chronic schizophrenia during decreasing number of psychiatric beds in Finland. *Schizophrenia research*. 2002;54(3):265-75.
37. Sohlman B, Lehtinen V. Mortality among discharged psychiatric patients in Finland. *Acta Psychiatrica Scandinavica*. 1999;99(2):102-9.

38. Stark C, MacLeod M, Hall D, O'Brien F, Pelosi A. Mortality after discharge from long-term psychiatric care in Scotland, 1977–94: a retrospective cohort study. *BMC Public Health*. 2003;3(1):1.
38. Tsai S-YM, Kuo C-J, Lee H-C. Risk factors for completed suicide in bipolar disorder. *The Journal of clinical psychiatry*. 2002;63(6):469-76.
40. Valenstein M, Kim HM, Ganoczy D, McCarthy JF, Zivin K, Austin KL, et al. Higher-risk periods for suicide among VA patients receiving depression treatment: prioritizing suicide prevention efforts. *J Affect Disord*. 2009 Jan;112(1-3):50-8. PubMed PMID: 18945495.
41. Weeke A, Væth M. Excess mortality of bipolar and unipolar manic-depressive patients. *Journal of affective disorders*. 1986;11(3):227-34.
42. Yim PHW, Yip PSF, Li RHY, Dunn ELW, Yeung WS, Miao YK. Suicide after discharge from psychiatric inpatient care: A case-control study in Hong Kong. *Australian and New Zealand Journal of Psychiatry*. 2004 January/February;38(1-2):65-72.

**eTable 3.** Sample-Level Data, Strength of Reporting, and Study Characteristics

| Study name         | Sample level data |        | Strength of reporting Items |    |    |    |    | Study characteristics |      |            |        |      |
|--------------------|-------------------|--------|-----------------------------|----|----|----|----|-----------------------|------|------------|--------|------|
|                    | Patients          | Subst. | Us                          | Co | De | In | Re | Country               | Meas | Age        | Sex    | Min  |
| Ajetunmobi (2013)  | 1393800           | 202.4  | 1                           | 1  | 1  | 0  | 0  | UK                    | 150  | Adult      | Both   | 1998 |
| Angst (2002)       | 10476             | 276.8  | 1                           | 1  | 0  | 0  | 0  | Switzerland           | 432  | Adult      | Female | 1979 |
| Angst (2002)       | 4140              | 362.3  | 1                           | 1  | 0  | 0  | 0  | Switzerland           | 432  | Adult      | Male   | 1979 |
| Avery (1976)       | 1557              | 513.8  | 1                           | 1  | 0  | 0  | 1  | USA                   | 36   | Adult      | Both   | 1968 |
| Barbato (1992)     | 538.5             | 928.5  | 0                           | 1  | 0  | 0  | 1  | Italy                 | 6    | Adult      | Both   | 1992 |
| Bergen (1998)      | 49.5              | 2020.2 | 0                           | 1  | 0  | 0  | 1  | Australia             | 6    | Adult      | Both   | 1995 |
| Berglund (1987)    | 14350             | 397.2  | 1                           | 1  | 0  | 0  | 0  | Sweden                | 246  | Adult      | Female | 1973 |
| Berglund (1987)    | 10373             | 443.5  | 1                           | 1  | 0  | 0  | 0  | Sweden                | 246  | Adult      | Male   | 1973 |
| Best (2004)        | 1400              | 71.4   | 0                           | 1  | 0  | 0  | 0  | USA                   | 240  | Adolescent | Both   | 1990 |
| Bjorkenstam (2014) | 303674            | 1481.9 | 1                           | 1  | 1  | 1  | 1  | Sweden                | 307  | Adult      | Female | 2003 |
| Bjorkenstam (2014) | 41752             | 1820.  | 1                           | 1  | 1  | 1  | 1  | Sweden                | 307  | Adult      | Male   | 2003 |

|                   |          |       |   |   |   |   |   |             |       |            |        |      |
|-------------------|----------|-------|---|---|---|---|---|-------------|-------|------------|--------|------|
|                   |          | 3     |   |   |   |   |   |             |       |            |        |      |
| Black (1985)      | 12318.6  | 251.7 | 1 | 1 | 0 | 0 | 1 | USA         | 50.4  | Adult      | Female | 1976 |
| Black (1985)      | 10585.33 | 349.5 | 1 | 1 | 0 | 0 | 1 | USA         | 51.24 | Adult      | Male   | 1976 |
| Blumenthal (1989) | 1290     | 930.2 | 0 | 1 | 0 | 0 | 0 | Germany     | 60    | Adult      | Both   | 1981 |
| Brent (1993)      | 74.82    | 10.0  | 0 | 1 | 0 | 0 | 1 | USA         | 6.7   | Adolescent | Both   | 1987 |
| Brodaty (1997)    | 3575     | 307.7 | 1 | 1 | 0 | 0 | 0 | Australia   | 300   | Adult      | Female | 1981 |
| Brodaty (1997)    | 1725     | 115.9 | 1 | 1 | 0 | 0 | 0 | Australia   | 300   | Adult      | Male   | 1981 |
| Burvill (1994)    | 515      | 776.7 | 1 | 1 | 0 | 0 | 1 | Australia   | 60    | Old        | Both   | 1994 |
| Castelein (2015)  | 2374.4   | 421.2 | 0 | 1 | 1 | 0 | 1 | Netherlands | 67.2  | Adult      | Both   | 2007 |
| Charrel (2015)    | 719.1    | 834.4 | 1 | 1 | 0 | 0 | 1 | France      | 61.2  | Adult      | Both   | 2008 |
| Charrel (2015)    | 10281.6  | 437.7 | 1 | 1 | 0 | 0 | 1 | France      | 61.2  | Adult      | Female | 2008 |
| Charrel (2015)    | 12245.1  | 588.0 | 1 | 1 | 0 | 0 | 1 | France      | 61.2  | Adult      | Male   | 2008 |
| Chen (1996)       | 80310    | 122.0 | 1 | 1 | 1 | 0 | 0 | Taiwan      | 72    | Adult      | Both   | 1990 |
| Choi (2012)       | 2055     | 535.3 | 1 | 1 | 0 | 0 | 1 | South Korea | 20.2  | Adult      | Female | 2005 |

|                 |             |                |   |   |   |   |   |             |        |          |        |      |
|-----------------|-------------|----------------|---|---|---|---|---|-------------|--------|----------|--------|------|
| Choi (2012)     | 1497.1      | 73<br>4.8      | 1 | 1 | 0 | 0 | 1 | South Korea | 18.831 | Adult    | Male   | 2005 |
| Choi (2012)     | 332.2       | 24<br>08.<br>2 | 1 | 1 | 0 | 0 | 1 | South Korea | 22.91  | Adult    | Female | 2005 |
| Choi (2012)     | 118         | 25<br>42.<br>4 | 1 | 1 | 0 | 0 | 1 | South Korea | 20.229 | Adult    | Male   | 2005 |
| Clark (1987)    | 1186        | 11<br>80.<br>4 | 1 | 1 | 0 | 0 | 1 | USA         | 24     | Adult    | Both   | 1987 |
| Coid (2007)     | 4121        | 48<br>5.3      | 0 | 1 | 0 | 0 | 1 | UK          | 74.4   | Forensic | Both   | 1994 |
| Coid (2007)     | 2454        | 40<br>7.5      | 0 | 1 | 0 | 0 | 1 | UK          | 74.4   | Forensic | Both   | 1994 |
| Craig (2006)    | 2320        | 86.<br>2       | 1 | 1 | 1 | 0 | 1 | USA         | 120    | Adult    | Both   | 1997 |
| Craig (2006)    | 3350        | 14<br>9.3      | 1 | 1 | 1 | 0 | 1 | USA         | 120    | Adult    | Both   | 1997 |
| Crisanti (1999) | 5320        | 52<br>6.3      | 1 | 1 | 0 | 0 | 0 | Canada      | 60     | Adult    | Both   | 1992 |
| Cristani (1999) | 5035        | 37<br>7.4      | 1 | 1 | 0 | 0 | 0 | Canada      | 60     | Adult    | Both   | 1992 |
| Curtis (1996)   | 399.2<br>08 | 50<br>1.0      | 1 | 1 | 0 | 1 | 0 | USA         | 33.5   | Adult    | Both   | 1987 |
| Curtis (1996)   | 407.5<br>83 | 73<br>6.0      | 1 | 1 | 0 | 1 | 0 | USA         | 33.5   | Adult    | Both   | 1987 |
| Davies (2007)   | 5132.<br>4  | 50<br>6.6      | 1 | 1 | 0 | 1 | 1 | UK          | 112.8  | Forensic | Both   | 1993 |
| De Leo (2007)   | 22          | 10.<br>0       | 0 | 1 | 0 | 0 | 1 | Australia   | 12     | Adult    | Both   | 2004 |

|                    |             |           |   |   |   |   |   |         |     |                |                |          |
|--------------------|-------------|-----------|---|---|---|---|---|---------|-----|----------------|----------------|----------|
| Deisenhamer (2016) | 65654       | 13<br>5.6 | 0 | 0 | 1 | 0 | 1 | Austria | 3   | Adult          | Bo<br>th       | 20<br>08 |
| Desai (2008&2005)  | 35747<br>7  | 29<br>5.7 | 1 | 1 | 1 | 0 | 0 | USA     | 36  | Adult          | Bo<br>th       | 19<br>96 |
| Donnelly (1996)    | 376         | 10.<br>0  | 0 | 1 | 0 | 0 | 1 | UK      | 24  | Adult          | Bo<br>th       | 19<br>92 |
| Donnelly (1997)    | 1422        | 21<br>1.0 | 0 | 1 | 0 | 0 | 0 | UK      | 54  | Long<br>Stay   | Bo<br>th       | 19<br>90 |
| Eastwood (1982)    | 13642       | 19<br>0.6 | 1 | 1 | 0 | 0 | 0 | Canada  | 114 | Adult          | Bo<br>th       | 19<br>74 |
| Engqvist (2006)    | 5700        | 15<br>7.9 | 1 | 1 | 1 | 0 | 0 | Sweden  | 240 | Adole<br>scent | Bo<br>th       | 19<br>86 |
| Furlan (2009)      | 704         | 10.<br>0  | 0 | 1 | 0 | 1 | 1 | Italy   | 48  | Adult          | Bo<br>th       | 20<br>00 |
| Geddes (1997)      | 34081<br>.1 | 48<br>7.1 | 1 | 1 | 1 | 1 | 1 | UK      | 12  | Adult          | Fe<br>ma<br>le | 19<br>70 |
| Geddes (1997)      | 35766<br>.2 | 57<br>8.8 | 1 | 1 | 1 | 1 | 1 | UK      | 12  | Adult          | Fe<br>ma<br>le | 19<br>75 |
| Geddes (1997)      | 33846<br>.2 | 65<br>8.9 | 1 | 1 | 1 | 1 | 1 | UK      | 12  | Adult          | Fe<br>ma<br>le | 19<br>80 |
| Geddes (1997)      | 31577<br>.4 | 55<br>1.0 | 1 | 1 | 1 | 1 | 1 | UK      | 12  | Adult          | Fe<br>ma<br>le | 19<br>85 |
| Geddes (1997)      | 30717<br>.8 | 51<br>4.4 | 1 | 1 | 1 | 1 | 1 | UK      | 12  | Adult          | Ma<br>le       | 19<br>70 |
| Geddes (1997)      | 34378<br>.6 | 66<br>9.0 | 1 | 1 | 1 | 1 | 1 | UK      | 12  | Adult          | Ma<br>le       | 19<br>75 |

|                    |             |                |   |   |   |   |   |    |    |       |                |          |
|--------------------|-------------|----------------|---|---|---|---|---|----|----|-------|----------------|----------|
| Geddes<br>(1997)   | 32981<br>.3 | 73<br>9.8      | 1 | 1 | 1 | 1 | 1 | UK | 12 | Adult | Ma<br>le       | 19<br>80 |
| Geddes<br>(1997)   | 31296<br>.5 | 73<br>4.9      | 1 | 1 | 1 | 1 | 1 | UK | 12 | Adult | Ma<br>le       | 19<br>85 |
| Geddes<br>(1997)   | 8783.<br>8  | 23<br>9.1      | 1 | 1 | 1 | 1 | 1 | UK | 12 | Old   | Fe<br>ma<br>le | 19<br>70 |
| Geddes<br>(1997)   | 10672<br>.5 | 29<br>0.5      | 1 | 1 | 1 | 1 | 1 | UK | 12 | Old   | Fe<br>ma<br>le | 19<br>75 |
| Geddes<br>(1997)   | 12991<br>.6 | 27<br>7.1      | 1 | 1 | 1 | 1 | 1 | UK | 12 | Old   | Fe<br>ma<br>le | 19<br>80 |
| Geddes<br>(1997)   | 14885<br>.6 | 27<br>5.4      | 1 | 1 | 1 | 1 | 1 | UK | 12 | Old   | Fe<br>ma<br>le | 19<br>85 |
| Geddes<br>(1997)   | 4768.<br>3  | 33<br>5.5      | 1 | 1 | 1 | 1 | 1 | UK | 12 | Old   | Ma<br>le       | 19<br>70 |
| Geddes<br>(1997)   | 5603.<br>5  | 44<br>6.1      | 1 | 1 | 1 | 1 | 1 | UK | 12 | Old   | Ma<br>le       | 19<br>75 |
| Geddes<br>(1997)   | 6854.<br>1  | 36<br>4.7      | 1 | 1 | 1 | 1 | 1 | UK | 12 | Old   | Ma<br>le       | 19<br>80 |
| Geddes<br>(1997)   | 8078.<br>4  | 34<br>6.6      | 1 | 1 | 1 | 1 | 1 | UK | 12 | Old   | Ma<br>le       | 19<br>85 |
| Goldacre<br>(1993) | 756         | 14<br>55.<br>0 | 1 | 0 | 1 | 1 | 1 | UK | 1  | Adult | Fe<br>ma<br>le | 19<br>83 |
| Goldacre<br>(1993) | 7649        | 62<br>7.5      | 1 | 0 | 1 | 1 | 1 | UK | 12 | Adult | Fe<br>ma<br>le | 19<br>83 |
| Goldacre<br>(1993) | 657         | 36<br>53.      | 1 | 0 | 1 | 1 | 1 | UK | 1  | Adult | Ma<br>le       | 19<br>83 |

|                 |      |                |   |   |   |   |   |        |            |                |                |          |
|-----------------|------|----------------|---|---|---|---|---|--------|------------|----------------|----------------|----------|
|                 |      | 0              |   |   |   |   |   |        |            |                |                |          |
| Goldacre (1993) | 6526 | 10<br>11.<br>3 | 1 | 0 | 1 | 1 | 1 | UK     | 12         | Adult          | Ma<br>le       | 19<br>83 |
| Goldacre (1993) | 315  | 15<br>87.<br>3 | 1 | 0 | 1 | 1 | 1 | UK     | 1          | Old            | Fe<br>ma<br>le | 19<br>83 |
| Goldacre (1993) | 2271 | 52<br>8.4      | 1 | 0 | 1 | 1 | 1 | UK     | 12         | Old            | Fe<br>ma<br>le | 19<br>83 |
| Goldacre (1993) | 146  | 27<br>39.<br>7 | 1 | 0 | 1 | 1 | 1 | UK     | 1          | Old            | Ma<br>le       | 19<br>83 |
| Goldacre (1993) | 960  | 83<br>3.3      | 1 | 0 | 1 | 1 | 1 | UK     | 12         | Old            | Ma<br>le       | 19<br>83 |
| Goldston (1995) | 720  | 10.<br>0       | 0 | 1 | 0 | 0 | 1 | USA    | 48         | Adole<br>scent | Bo<br>th       | 19<br>95 |
| Hansen (2001)   | 5469 | 42<br>0.6      | 1 | 1 | 1 | 0 | 0 | Norway | 69.<br>595 | Adult          | Fe<br>ma<br>le | 19<br>86 |
| Hansen (2001)   | 5994 | 83<br>4.2      | 1 | 1 | 1 | 0 | 0 | Norway | 68.<br>178 | Adult          | Ma<br>le       | 19<br>86 |
| Hayashi (2012)  | 116  | 25<br>86.<br>2 | 0 | 1 | 0 | 0 | 1 | Japan  | 24         | Adult          | Fe<br>ma<br>le | 20<br>07 |
| Hayashi (2012)  | 96   | 31<br>25.<br>0 | 0 | 1 | 0 | 0 | 1 | Japan  | 24         | Adult          | Ma<br>le       | 20<br>07 |
| Healy (2012)    | 520  | 57<br>6.9      | 1 | 1 | 1 | 0 | 1 | UK     | 60         | Adult          | Bo<br>th       | 20<br>02 |
| Healy (2012)    | 1015 | 98<br>5.2      | 1 | 1 | 1 | 0 | 1 | UK     | 60         | Adult          | Bo<br>th       | 20<br>02 |

|                          |         |       |   |   |   |   |   |                 |       |            |        |      |
|--------------------------|---------|-------|---|---|---|---|---|-----------------|-------|------------|--------|------|
| Herpertz-Dahlmann (2001) | 390     | 10.0  | 0 | 1 | 0 | 0 | 1 | Germany         | 120   | Adolescent | Both   | 1990 |
| Ho (2003)                | 18197   | 758.4 | 1 | 1 | 1 | 1 | 1 | Hong Kong China | 12    | Adult      | Female | 1998 |
| Ho (2003)                | 20136   | 839.3 | 1 | 1 | 1 | 1 | 1 | Hong Kong China | 12    | Adult      | Male   | 1998 |
| Ho (2003)                | 3190    | 532.9 | 1 | 1 | 1 | 1 | 1 | Hong Kong China | 12    | Old        | Female | 1998 |
| Ho (2003)                | 2044    | 440.3 | 1 | 1 | 1 | 1 | 1 | Hong Kong China | 12    | Old        | Male   | 1998 |
| Hobbs (2002)             | 282     | 10.0  | 0 | 1 | 0 | 1 | 1 | Australia       | 72    | Long Stay  | Both   | 2002 |
| Hoffmann (1987)          | 11200   | 473.2 | 1 | 0 | 0 | 0 | 1 | Switzerland     | 12    | Adult      | Both   | 1977 |
| Hoye (2011)              | 6584    | 136.7 | 1 | 1 | 1 | 0 | 1 | Norway          | 186   | Adult      | Female | 1993 |
| Hoye (2011)              | 9545    | 419.1 | 1 | 1 | 1 | 0 | 1 | Norway          | 166.8 | Adult      | Male   | 1993 |
| Hoye (2013)              | 3204    | 312.1 | 1 | 1 | 1 | 0 | 1 | Norway          | 135.6 | Adult      | Female | 1993 |
| Hoye (2013)              | 3420    | 350.9 | 1 | 1 | 1 | 0 | 1 | Norway          | 141.6 | Adult      | Male   | 1993 |
| Jamieson (2005)          | 1053.86 | 474.4 | 1 | 1 | 0 | 1 | 1 | UK              | 61.39 | Forensic   | Both   | 1987 |
| Jamieson                 | 929     | 10    | 1 | 1 | 0 | 1 | 1 | UK              | 56.   | Forens     | Bo     | 19   |

|                                   |                     |           |   |   |   |   |   |               |           |                      |                |          |
|-----------------------------------|---------------------|-----------|---|---|---|---|---|---------------|-----------|----------------------|----------------|----------|
| (2005)                            |                     | 7.6       |   |   |   |   |   |               | 02        | ic                   | th             | 99       |
| Jones (2011)                      | 9758                | 25<br>6.0 | 1 | 1 | 0 | 1 | 1 | UK            | 138       | Adult                | Fe<br>ma<br>le | 19<br>86 |
| Jones (2011)                      | 40031               | 28<br>7.0 | 1 | 1 | 0 | 1 | 1 | UK            | 138       | Adult                | Ma<br>le       | 19<br>86 |
| Kessler<br>(2015)                 | 25767<br>.3361<br>1 | 26<br>3.9 | 1 | 1 | 1 | 0 | 1 | USA           | 12        | Adult                | Bo<br>th       | 20<br>07 |
| Kittirattanap<br>aiboon<br>(2010) | 7254                | 45<br>4.9 | 1 | 1 | 0 | 0 | 0 | Thailand      | 78        | Substa<br>nce<br>Use | Bo<br>th       | 20<br>04 |
| Kjelsberg<br>(1994)               | 12727<br>.2727<br>3 | 11<br>0.0 | 1 | 1 | 1 | 0 | 1 | Norway        | 180       | Adole<br>scent       | Fe<br>ma<br>le | 19<br>77 |
| Kjelsberg<br>(1994)               | 14482<br>.7586<br>2 | 14<br>5.0 | 1 | 1 | 1 | 0 | 1 | Norway        | 180       | Adole<br>scent       | Ma<br>le       | 19<br>77 |
| Kuo (2010)                        | 34798<br>.5         | 44<br>5.4 | 1 | 1 | 0 | 0 | 0 | Taiwan        | 66        | Adult                | Bo<br>th       | 20<br>02 |
| Kuo (2010)                        | 25921<br>.5         | 36<br>6.5 | 1 | 1 | 0 | 0 | 0 | Taiwan        | 66        | Adult                | Bo<br>th       | 20<br>02 |
| Kuperman<br>(1988)                | 4185                | 47.<br>8  | 1 | 1 | 0 | 1 | 1 | USA           | 111<br>.6 | Adole<br>scent       | Fe<br>ma<br>le | 19<br>78 |
| Kuperman<br>(1988)                | 7929                | 12<br>6.1 | 1 | 1 | 0 | 1 | 1 | USA           | 108       | Adole<br>scent       | Ma<br>le       | 19<br>78 |
| Lawrence<br>(1999)                | 20821<br>5          | 61.<br>5  | 1 | 1 | 1 | 0 | 0 | Australi<br>a | 90        | Adult                | Fe<br>ma<br>le | 19<br>87 |
| Lawrence<br>(1999)                | 18321<br>0          | 18<br>7.2 | 1 | 1 | 1 | 0 | 0 | Australi<br>a | 90        | Adult                | Ma<br>le       | 19<br>87 |

|                     |            |                |   |   |   |   |   |             |            |                      |                |          |
|---------------------|------------|----------------|---|---|---|---|---|-------------|------------|----------------------|----------------|----------|
| Lee (2009)          | 18750      | 46<br>4.0      | 1 | 1 | 1 | 0 | 1 | Taiwan      | 3          | Adult                | Bo<br>th       | 20<br>03 |
| Lindelius<br>(1974) | 761        | 91<br>9.8      | 1 | 1 | 0 | 0 | 1 | Sweden      | 84         | Substa<br>nce<br>Use | Fe<br>ma<br>le | 19<br>67 |
| Lindelius<br>(1974) | 910        | 32<br>9.7      | 1 | 1 | 0 | 0 | 1 | Sweden      | 84         | Substa<br>nce<br>Use | Ma<br>le       | 19<br>67 |
| Links (2012)        | 60         | 50<br>00.<br>0 | 0 | 1 | 0 | 0 | 1 | Canada      | 6          | Adult                | Bo<br>th       | 20<br>08 |
| Luxton<br>(2013)    | 21368<br>7 | 71.<br>6       | 1 | 1 | 1 | 0 | 1 | USA         | 37.<br>192 | Adult                | Bo<br>th       | 20<br>06 |
| Luxton<br>(2013)    | 5745       | 57<br>8.5      | 1 | 1 | 1 | 0 | 1 | USA         | 1          | Adult                | Bo<br>th       | 20<br>06 |
| Maden<br>(1999)     | 1379.<br>4 | 58<br>0.0      | 0 | 1 | 0 | 1 | 1 | UK          | 79.<br>2   | Forens<br>ic         | Bo<br>th       | 19<br>87 |
| Madsen<br>(2013)    | 5557       | 14<br>21.<br>6 | 1 | 1 | 1 | 0 | 1 | Denmar<br>k | 3          | Adult                | Bo<br>th       | 19<br>98 |
| Madsen<br>(2013)    | 6352       | 11<br>80.<br>7 | 1 | 1 | 1 | 0 | 1 | Denmar<br>k | 3          | Adult                | Bo<br>th       | 19<br>99 |
| Madsen<br>(2013)    | 6518       | 11<br>66.<br>0 | 1 | 1 | 1 | 0 | 1 | Denmar<br>k | 3          | Adult                | Bo<br>th       | 20<br>00 |
| Madsen<br>(2013)    | 6622       | 13<br>28.<br>9 | 1 | 1 | 1 | 0 | 1 | Denmar<br>k | 3          | Adult                | Bo<br>th       | 20<br>01 |
| Madsen<br>(2013)    | 6712       | 95<br>3.5      | 1 | 1 | 1 | 0 | 1 | Denmar<br>k | 3          | Adult                | Bo<br>th       | 20<br>02 |
| Madsen              | 6784       | 92             | 1 | 1 | 1 | 0 | 1 | Denmar      | 3          | Adult                | Bo             | 20       |

|                  |        |        |   |   |   |   |   |         |         |           |        |      |
|------------------|--------|--------|---|---|---|---|---|---------|---------|-----------|--------|------|
| (2013)           |        | 8.7    |   |   |   |   |   | k       |         |           | th     | 03   |
| Madsen (2013)    | 6750   | 1037.0 | 1 | 1 | 1 | 0 | 1 | Denmark | 3       | Adult     | Both   | 2004 |
| Madsen (2013)    | 6675   | 1003.7 | 1 | 1 | 1 | 0 | 1 | Denmark | 3       | Adult     | Both   | 2005 |
| Madsen (2013)    | 470    | 638.3  | 1 | 1 | 1 | 0 | 1 | Denmark | 3       | Adult     | Both   | 2006 |
| Mastroeni (2005) | 485    | 10.0   | 0 | 1 | 0 | 1 | 0 | Italy   | 60      | Long Stay | Both   | 1999 |
| McGlashan (1988) | 1635   | 611.6  | 0 | 1 | 0 | 0 | 1 | USA     | 180     | Adult     | Both   | 1975 |
| McGlashan (1988) | 1815   | 165.3  | 0 | 1 | 0 | 0 | 1 | USA     | 180     | Adult     | Both   | 1975 |
| Meloni (2006)    | 5329.5 | 562.9  | 1 | 1 | 1 | 0 | 1 | Italy   | 136.654 | Adult     | Female | 1995 |
| Meloni (2006)    | 4360.5 | 504.5  | 1 | 1 | 1 | 0 | 1 | Italy   | 138.796 | Adult     | Male   | 1995 |
| Menezes (1996)   | 232    | 1724.1 | 0 | 1 | 0 | 0 | 1 | Brazil  | 24      | Adult     | Both   | 1992 |
| Miller (2006)    | 50050  | 215.8  | 1 | 1 | 1 | 0 | 0 | USA     | 30      | Adult     | Both   | 2002 |
| Moller (1982)    | 566.5  | 882.6  | 0 | 1 | 0 | 0 | 0 | Germany | 66      | Adult     | Both   | 1977 |
| Motto (2001)     | 45075  | 552.4  | 1 | 1 | 0 | 0 | 1 | USA     | 180     | Adult     | Both   | 1979 |
| Naik (1997)      | 1392   | 10.    | 1 | 1 | 0 | 1 | 0 | UK      | 192     | Adult     | Bo     | 19   |

|                        |        |        |   |   |   |   |   |                    |        |            |        |      |
|------------------------|--------|--------|---|---|---|---|---|--------------------|--------|------------|--------|------|
|                        |        | 0      |   |   |   |   |   |                    |        |            | th     | 83   |
| Ng (2000)              | 225    | 10.0   | 0 | 1 | 0 | 1 | 0 | Hong Kong<br>China | 60     | Long Stay  | Both   | 1996 |
| Opjordsmoe<br>n (2010) | 252    | 793.7  | 0 | 1 | 1 | 0 | 1 | Norway,<br>Denmark | 24     | Adult      | Both   | 1998 |
| Opjordsmoe<br>n (2010) | 182    | 1648.4 | 0 | 1 | 1 | 0 | 1 | Norway,<br>Denmark | 24     | Adult      | Both   | 1998 |
| Osby (2001)            | 101393 | 396.5  | 1 | 1 | 1 | 1 | 1 | Sweden             | 138.12 | Adult      | Female | 1984 |
| Osby (2001)            | 69222  | 624.1  | 1 | 1 | 1 | 1 | 1 | Sweden             | 126.24 | Adult      | Male   | 1984 |
| Osby (2001)            | 249366 | 460.8  | 1 | 1 | 1 | 1 | 1 | Sweden             | 128.16 | Adult      | Female | 1984 |
| Osby (2001)            | 148372 | 809.5  | 1 | 1 | 1 | 1 | 1 | Sweden             | 112.44 | Adult      | Male   | 1984 |
| Owen<br>(1997)         | 64     | 6250.0 | 0 | 1 | 0 | 0 | 1 | Australia          | 6      | Adult      | Both   | 1997 |
| Park (2013a)           | 3298   | 212.2  | 1 | 1 | 0 | 0 | 0 | South Korea        | 108    | Adolescent | Female | 2002 |
| Park (2013a)           | 3722   | 188.1  | 1 | 1 | 0 | 0 | 0 | South Korea        | 108    | Adolescent | Male   | 2002 |
| Park<br>(2013b)        | 4249   | 1153.2 | 1 | 1 | 1 | 0 | 1 | South Korea        | 12     | Adult      | Female | 1997 |
| Park                   | 3267   | 11     | 1 | 1 | 1 | 0 | 1 | South              | 12     | Adult      | Ma     | 19   |

|                 |        |        |   |   |   |   |   |             |     |            |        |      |
|-----------------|--------|--------|---|---|---|---|---|-------------|-----|------------|--------|------|
| (2013b)         |        | 01.9   |   |   |   |   |   | Korea       |     |            | le     | 97   |
| Park (2013b)    | 514.4  | 1166.4 | 1 | 1 | 1 | 0 | 1 | South Korea | 12  | Old        | Female | 1997 |
| Park (2013b)    | 303.4  | 1648.0 | 1 | 1 | 1 | 0 | 1 | South Korea | 12  | Old        | Male   | 1997 |
| Park (2015a)    | 1722   | 174.2  | 1 | 1 | 0 | 1 | 0 | South Korea | 72  | Adolescent | Female | 2005 |
| Park (2015a)    | 2646   | 37.8   | 1 | 1 | 0 | 1 | 0 | South Korea | 72  | Adolescent | Male   | 2005 |
| Park (2015b)    | 60335  | 321.5  | 1 | 1 | 0 | 0 | 1 | South Korea | 102 | Adult      | Both   | 2002 |
| Pedersen (2014) | 3912   | 434.6  | 1 | 1 | 1 | 0 | 1 | Denmark     | 12  | Adult      | Female | 2007 |
| Pedersen (2014) | 5833   | 805.8  | 1 | 1 | 1 | 0 | 1 | Denmark     | 12  | Adult      | Male   | 2007 |
| Peuskens (1997) | 1194   | 586.3  | 0 | 1 | 0 | 0 | 1 | Belgium     | 72  | Adult      | Female | 1986 |
| Peuskens (1997) | 1818   | 1100.1 | 0 | 1 | 0 | 0 | 1 | Belgium     | 72  | Adult      | Male   | 1986 |
| Pirkola (2007)  | 163236 | 1211.7 | 1 | 1 | 1 | 0 | 1 | Finland     | 12  | Adult      | Both   | 1988 |
| Pirkola (2007)  | 191764 | 971.5  | 1 | 1 | 1 | 0 | 1 | Finland     | 12  | Adult      | Both   | 1998 |
| Pokorny         | 545    | 10.    | 1 | 1 | 0 | 0 | 1 | USA         | 60  | Adult      | Fe     | 19   |

|                     |             |                |   |   |   |   |   |             |            |                |                |          |
|---------------------|-------------|----------------|---|---|---|---|---|-------------|------------|----------------|----------------|----------|
| (1983)              |             | 0              |   |   |   |   |   |             |            |                | ma<br>le       | 83       |
| Pokorny<br>(1983)   | 23455       | 28<br>5.7      | 1 | 1 | 0 | 0 | 1 | USA         | 60         | Adult          | Ma<br>le       | 19<br>83 |
| Politi (2002)       | 22226<br>.3 | 20<br>7.0      | 1 | 1 | 0 | 0 | 1 | Italy       | 124<br>.17 | Adult          | Bo<br>th       | 19<br>90 |
| Qurashi<br>(2006)   | 17.25       | 57<br>97.<br>1 | 0 | 1 | 0 | 0 | 1 | UK          | 3          | Adult          | Bo<br>th       | 20<br>07 |
| Remberk<br>(2014)   | 1264        | 15<br>8.2      | 0 | 1 | 0 | 0 | 1 | Poland      | 96         | Adole<br>scent | Bo<br>th       | 20<br>08 |
| Robling<br>(2000)   | 1886        | 10<br>6.0      | 0 | 1 | 0 | 1 | 1 | UK          | 276        | Adult          | Fe<br>ma<br>le | 19<br>90 |
| Ruengorn<br>(2011)  | 235         | 29<br>78.<br>7 | 0 | 1 | 0 | 0 | 1 | Thailand    | 12         | Adult          | Bo<br>th       | 20<br>09 |
| Rydelius<br>(1984)  | 3534        | 22<br>6.4      | 1 | 1 | 0 | 0 | 0 | Sweden      | 72         | Adole<br>scent | Fe<br>ma<br>le | 19<br>76 |
| Rydelius<br>(1984)  | 3726        | 18<br>7.9      | 1 | 1 | 0 | 0 | 0 | Sweden      | 72         | Adole<br>scent | Ma<br>le       | 19<br>76 |
| Sani (2011)         | 41825       | 98.<br>0       | 1 | 1 | 0 | 0 | 0 | Italy       | 210        | Adult          | Fe<br>ma<br>le | 19<br>81 |
| Sani (2011)         | 35892       | 13<br>9.3      | 1 | 1 | 0 | 0 | 0 | Italy       | 210        | Adult          | Ma<br>le       | 19<br>81 |
| Schneider<br>(2001) | 960         | 14<br>58.<br>3 | 0 | 1 | 0 | 0 | 1 | German<br>y | 60         | Adult          | Fe<br>ma<br>le | 20<br>01 |
| Schneider<br>(2001) | 440         | 45<br>4.5      | 0 | 1 | 0 | 0 | 1 | German<br>y | 60         | Adult          | Ma<br>le       | 20<br>01 |

|                    |            |                |   |   |   |   |   |             |           |            |        |          |
|--------------------|------------|----------------|---|---|---|---|---|-------------|-----------|------------|--------|----------|
| Seemuller (2014)   | 2853       | 10<br>5.2      | 0 | 1 | 0 | 0 | 0 | Germany     | 36        | Adult      | Both   | 20<br>14 |
| Simpson (2006)     | 190        | 10.<br>0       | 0 | 1 | 0 | 0 | 1 | New Zealand | 21.<br>7  | Forensic   | Both   | 20<br>03 |
| Skeem (2006)       | 951        | 21<br>0.3      | 0 | 1 | 0 | 0 | 1 | USA         | 12        | Adult      | Both   | 19<br>88 |
| Tabita (2012)      | 47         | 10.<br>0       | 1 | 1 | 0 | 1 | 1 | Sweden      | 112<br>.8 | Forensic   | Female | 20<br>00 |
| Tabita (2012)      | 545.2      | 14<br>67.<br>4 | 1 | 1 | 0 | 1 | 1 | Sweden      | 112<br>.8 | Forensic   | Male   | 20<br>00 |
| Tejedor (1999)     | 840        | 11<br>90.<br>5 | 0 | 1 | 0 | 0 | 1 | Spain       | 120       | Adult      | Female | 19<br>90 |
| Tejedor (1999)     | 660        | 12<br>12.<br>1 | 0 | 1 | 0 | 0 | 1 | Spain       | 120       | Adult      | Male   | 19<br>90 |
| Thomsen (1996)     | 3330       | 10.<br>0       | 1 | 1 | 1 | 0 | 1 | Denmark     | 270       | Adolescent | Female | 19<br>81 |
| Thomsen (1996)     | 8915.<br>2 | 89.<br>7       | 1 | 1 | 1 | 0 | 1 | Denmark     | 268<br>.8 | Adolescent | Male   | 19<br>81 |
| Thornicroft (1993) | 1060       | 10<br>37.<br>7 | 0 | 1 | 0 | 0 | 0 | Switzerland | 240       | Adult      | Both   | 19<br>77 |
| Thornicroft (2005) | 73         | 10.<br>0       | 0 | 1 | 0 | 0 | 1 | UK          | 12        | Long Stay  | Both   | 20<br>05 |
| Trieman (1999)     | 3350       | 41<br>7.9      | 0 | 1 | 0 | 1 | 1 | UK          | 60        | Long Stay  | Both   | 19<br>93 |
| Tseng (2006)       | 78.16<br>7 | 12<br>79.      | 0 | 1 | 0 | 0 | 1 | Taiwan      | 14        | Adult      | Both   | 20<br>01 |

|                |               |                |   |   |   |   |   |                       |           |                |                |          |
|----------------|---------------|----------------|---|---|---|---|---|-----------------------|-----------|----------------|----------------|----------|
|                |               | 3              |   |   |   |   |   |                       |           |                |                |          |
| Welner (1979)  | 376           | 26<br>6.0      | 0 | 1 | 0 | 0 | 1 | USA                   | 112<br>.8 | Adole<br>scent | Fe<br>ma<br>le | 19<br>71 |
| Welner (1979)  | 347.8         | 14<br>37.<br>6 | 0 | 1 | 0 | 0 | 1 | USA                   | 112<br>.8 | Adole<br>scent | Ma<br>le       | 19<br>71 |
| Wiersma (1998) | 1230          | 73<br>1.7      | 0 | 1 | 1 | 1 | 1 | Netherla<br>nds       | 180       | Adult          | Bo<br>th       | 19<br>86 |
| Winkler (2015) | 22876<br>.667 | 16<br>26.<br>1 | 1 | 1 | 1 | 0 | 0 | Czech<br>Republi<br>c | 2         | Adult          | Bo<br>th       | 20<br>10 |
| Zilber (1989)  | 83175         | 42.<br>1       | 1 | 1 | 1 | 0 | 1 | Israel                | 60        | Adult          | Bo<br>th       | 19<br>81 |
| Zubenko (1997) | 1686          | 10.<br>0       | 1 | 1 | 0 | 0 | 1 | USA                   | 37.<br>2  | Old            | Fe<br>ma<br>le | 19<br>94 |
| Zubenko (1997) | 921           | 32<br>5.7      | 1 | 1 | 0 | 0 | 1 | USA                   | 37.<br>2  | Old            | Ma<br>le       | 19<br>94 |
